# Supplementary material for: M2 Macrophages Infiltrating Epithelial Ovarian Cancer Express MDR1: A Feature That May Account for the Poor Prognosis
Source: Cells. 2020 May 15;9(5):1224. doi: 10.3390/cells9051224 (PMC7290705; doi:10.3390/cells9051224)
Supplement: Supplementary file 1 [file cells-09-01224-s001.pdf]

*Supplementary file to*

**M2 Macrophages infiltrating epithelial ovarian cancer express MDR1: A feature that may account for the poor prognosis**

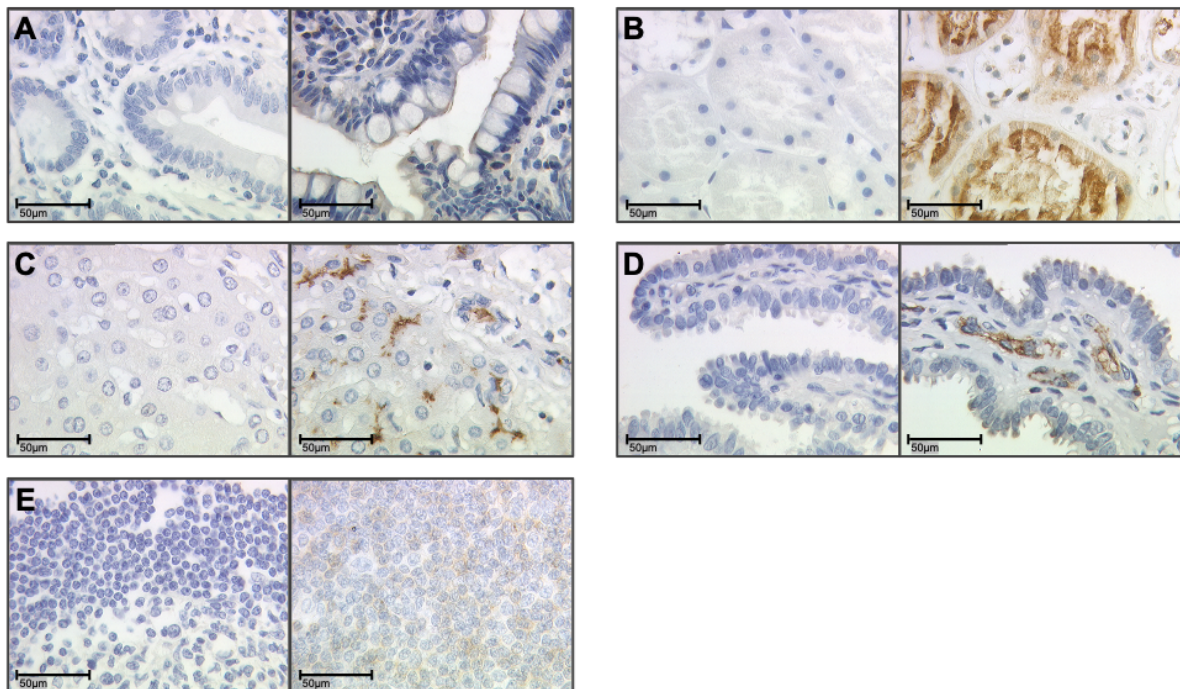

**Figure S1** Negative (left) and positive (right) system control for MDR1 staining in tissue form human small intestine (A), kidney (B), liver (C), fallopian tube (D) and tonsil (E). A-E are shown in 40x (scale bar=50 μm) magnification.

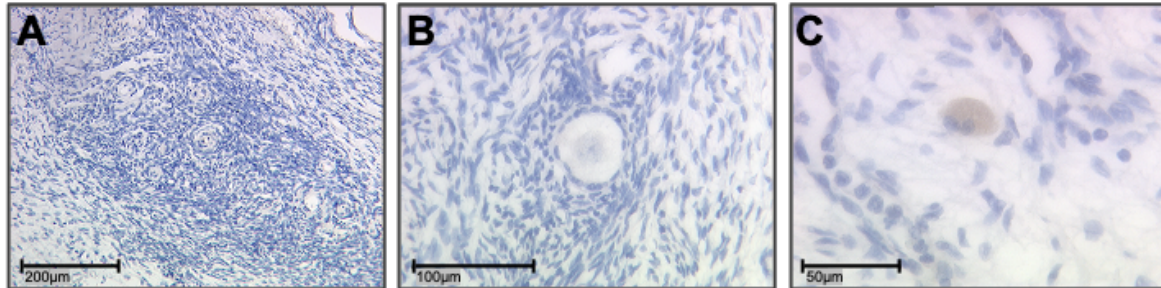

**Figure S2** MDR1 immunostaining in healthy ovary. In contrast to the area of the tumor, healthy ovarian tissue (nigter spinocellular connective tissue nor follicles) was not positive for MDR1. Only sporadic MDR1+ infiltrating immune cells were found (C), but in lower density compared to EOC. A 10x (scale bar=200  $\mu$ m), B 25x (scale bar=100  $\mu$ m), C 40x (scale bar=50  $\mu$ m) magnification.

**Table S3** Antibodies used for immunofluorescence co-staining.

| Antibody                                       | Dilution | Manufacturer                      |
|------------------------------------------------|----------|-----------------------------------|
| <i>Primary antibodies</i>                      |          |                                   |
| MDR1, monoclonal rabbit IgG                    | 1:100    | Abcam, Cambridge, UK              |
| CD68, monoclonal mouse IgG1                    | 1:1000   | Sigma Aldrich, St. Louis, MO, USA |
| CD163, polyclonal rabbit IgG                   | 1:2000   | Sigma Aldrich, St. Louis, MO, USA |
| CD163, monoclonal mouse IgG1                   | 1:800    | Abcam, Cambridge, UK              |
| CD3, monoclonal mouse IgG1                     | 1:75     | Dako, Glostrup, Denmark           |
| CD45, monoclonal mouse IgG1                    | 1:200    | Dako, Glostrup, Denmark           |
| CD56, monoclonal mouse IgG1                    | 1:100    | Serotec, Puchheim, Germany        |
| TLR2, monoclonal mouse IgG1                    | 1:800    | Novusbio, Centennial, CO, USA     |
| TLR2, monoclonal rabbit IgG                    | 1:100    | Abcam, Cambridge, UK              |
| <i>Secondary antibodies</i>                    |          |                                   |
| Cy3-conjugated goat-anti-rabbit IgG            | 1:500    | Dianova, Hamburg, Germany         |
| Alexa Fluor 488-conjugated goat-anti-mouse IgG | 1:100    | Dianova, Hamburg, Germany         |

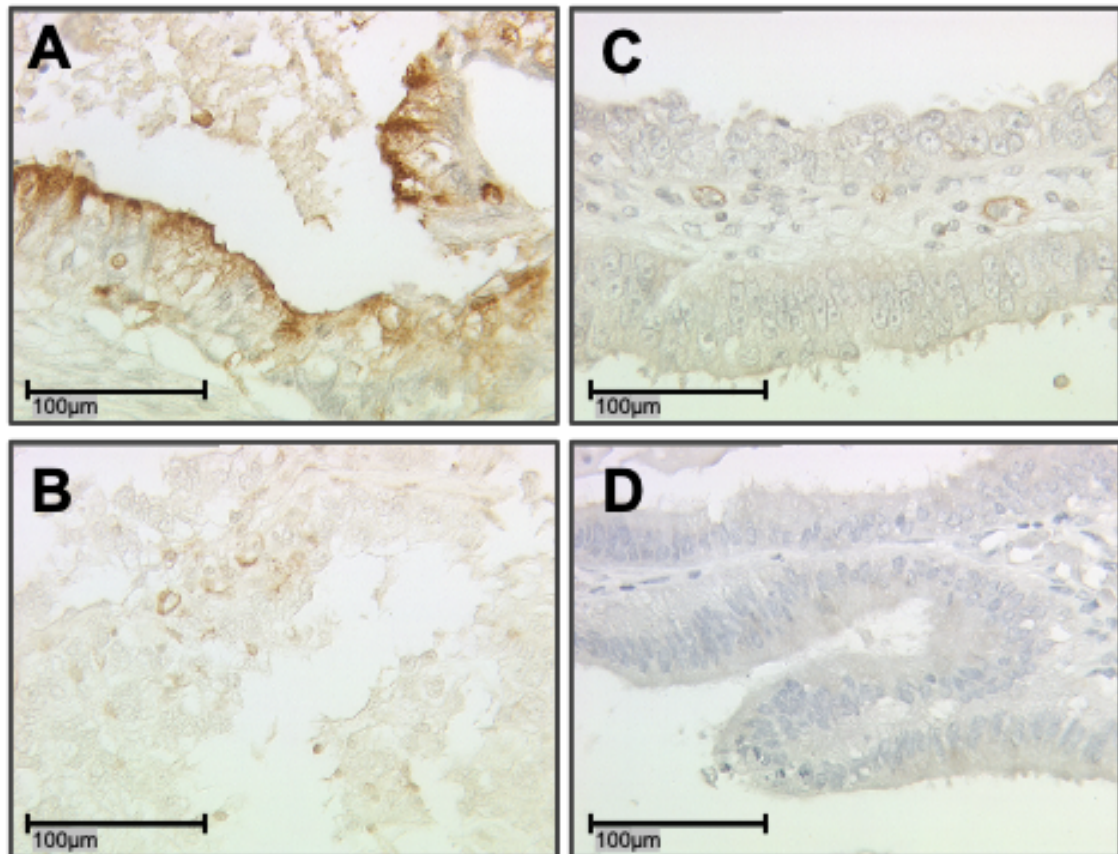

**Figure S4** MDR1 immunostaining of ovarian cancer cells. Membranous expression of MDR1 on ovarian cancer cells differs between the subtypes with mucinous (A, IRS=6) and clear cell (B, IRS=4) showing a higher expression than serous (C, IRS=3) and endometrioid (D, IRS=2). A-D are shown in 25x magnification (scale bar=100 µm).

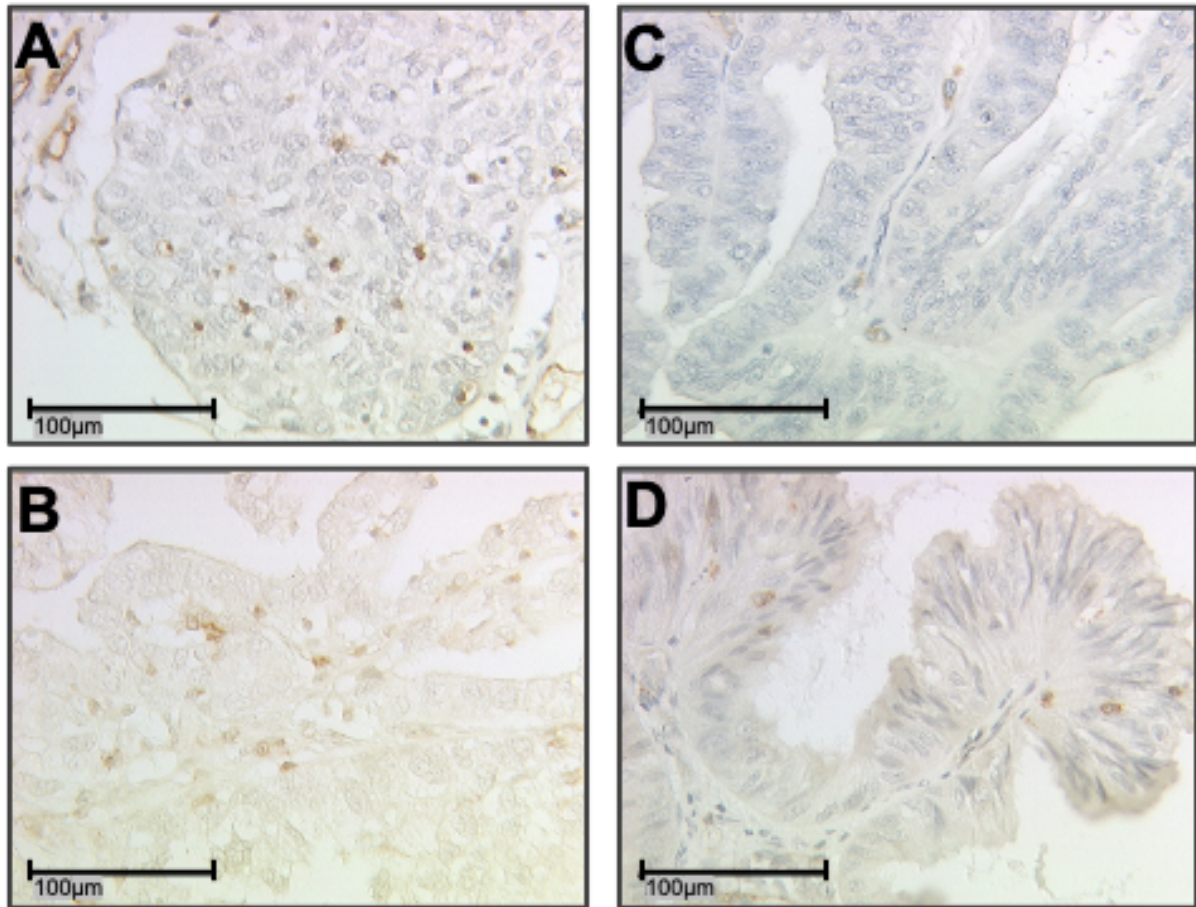

**Figure S5** MDR1 positive leucocyte infiltrate was detected by immunohistochemistry in all subtypes: serous (A), clear cell (B), endometrioid (C) and mucinous carcinoma (D). A-D are shown in 25x magnification (scale bar=100 µm).

**Table S6** Correlation analysis between MDR1+ leucocyte infiltration and clinicopathological data for the whole collective.

|                                                   | Age     | Subtype  | FIGO     | pT       | pN       | Grading clear cell, mucinous, endometrioid | Grading serous | MDR1+ leucocyte infiltration |
|---------------------------------------------------|---------|----------|----------|----------|----------|--------------------------------------------|----------------|------------------------------|
| <i>Age</i>                                        |         |          |          |          |          |                                            |                |                              |
| Cc                                                | 1       | -0.127   | 0.16     | 0.203*   | -0.014   | -0.091                                     | 0.299**        | 0.055                        |
| p                                                 | -       | 0.113    | 0.05     | 0.011    | 0.894    | 0.268                                      | 0              | 0.537                        |
| n                                                 | 156     | 156      | 151      | 155      | 95       | 151                                        | 156            | 127                          |
| <i>Subtype</i>                                    |         |          |          |          |          |                                            |                |                              |
| Cc                                                | -0.127  | 1        | -0.404** | -0.374** | -0.366** | 0.945**                                    | -0.652**       | 0.031                        |
| p                                                 | 0.113   | -        | 0        | 0        | 0        | 0                                          | 0              | 0.729                        |
| n                                                 | 156     | 156      | 151      | 155      | 95       | 151                                        | 156            | 127                          |
| <i>FIGO</i>                                       |         |          |          |          |          |                                            |                |                              |
| Cc                                                | 0.16    | -0.404** | 1        | 0.841**  | 0.764**  | -0.334**                                   | 0.435**        | 0.03                         |
| p                                                 | 0.05    | 0        | -        | 0        | 0        | 0                                          | 0              | 0.744                        |
| n                                                 | 151     | 151      | 151      | 151      | 92       | 148                                        | 151            | 123                          |
| <i>pT</i>                                         |         |          |          |          |          |                                            |                |                              |
| Cc                                                | 0.203*  | -0.374** | 0.841**  | 1        | 0.587**  | -0.318**                                   | 0.518**        | 0.084                        |
| p                                                 | 0.011   | 0        | 0        | -        | 0        | 0                                          | 0              | 0.349                        |
| n                                                 | 155     | 155      | 151      | 155      | 95       | 151                                        | 155            | 126                          |
| <i>pN</i>                                         |         |          |          |          |          |                                            |                |                              |
| Cc                                                | -0.014  | -0.366** | 0.764**  | 0.587**  | 1        | -0.225*                                    | 0.251*         | 0.053                        |
| p                                                 | 0.894   | 0        | 0        | 0        | -        | 0.031                                      | 0.014          | 0.641                        |
| n                                                 | 95      | 95       | 92       | 95       | 95       | 92                                         | 95             | 81                           |
| <i>Grading clear cell, mucinous, endometrioid</i> |         |          |          |          |          |                                            |                |                              |
| Cc                                                | -0.091  | 0.945**  | -0.334** | -0.318** | -0.225*  | 1                                          | -0.629**       | 0.05                         |
| p                                                 | 0.268   | 0        | 0        | 0        | 0.031    | -                                          | 0              | 0.584                        |
| n                                                 | 151     | 151      | 148      | 151      | 92       | 151                                        | 151            | 123                          |
| <i>Grading serous</i>                             |         |          |          |          |          |                                            |                |                              |
| Cc                                                | 0.299** | -0.652** | 0.435**  | 0.518**  | 0.251*   | -0.629**                                   | 1              | 0.071                        |
| p                                                 | 0       | 0        | 0        | 0        | 0.014    | 0                                          | -              | 0.424                        |
| n                                                 | 156     | 156      | 151      | 155      | 95       | 151                                        | 156            | 127                          |
| <i>MDR1+ leucocyte infiltration</i>               |         |          |          |          |          |                                            |                |                              |
| Cc                                                | 0.055   | 0.031    | 0.03     | 0.084    | 0.053    | 0.05                                       | 0.071          | 1                            |
| n                                                 | 537     | 729      | 744      | 349      | 641      | 584                                        | 424            | -                            |
| n                                                 | 127     | 127      | 123      | 126      | 81       | 123                                        | 127            | 127                          |

Clinicopathologic data and a MDR1+ leucocyte infiltrate were correlated to each other using Spearman's correlation analysis. Significant correlations are indicated by asterisks (\*:  $p < 0.05$ ; \*\*:  $p < 0.01$ ). Cc: correlation coefficient, p: two-tailed significance, n: number of patients.

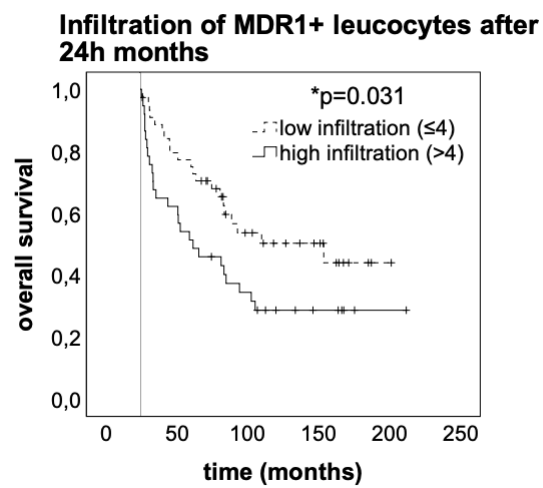

**Figure S7** The MDR1+ leucocyte infiltrate mediates long term effects. Excluding the early deaths, which can be attributed to therapeutic consequences and bad general condition, the prognostic negative effect of a high MDR1+ leucocyte infiltrate becomes apparent ( $p=0.031$ ,  $n=82$ ).

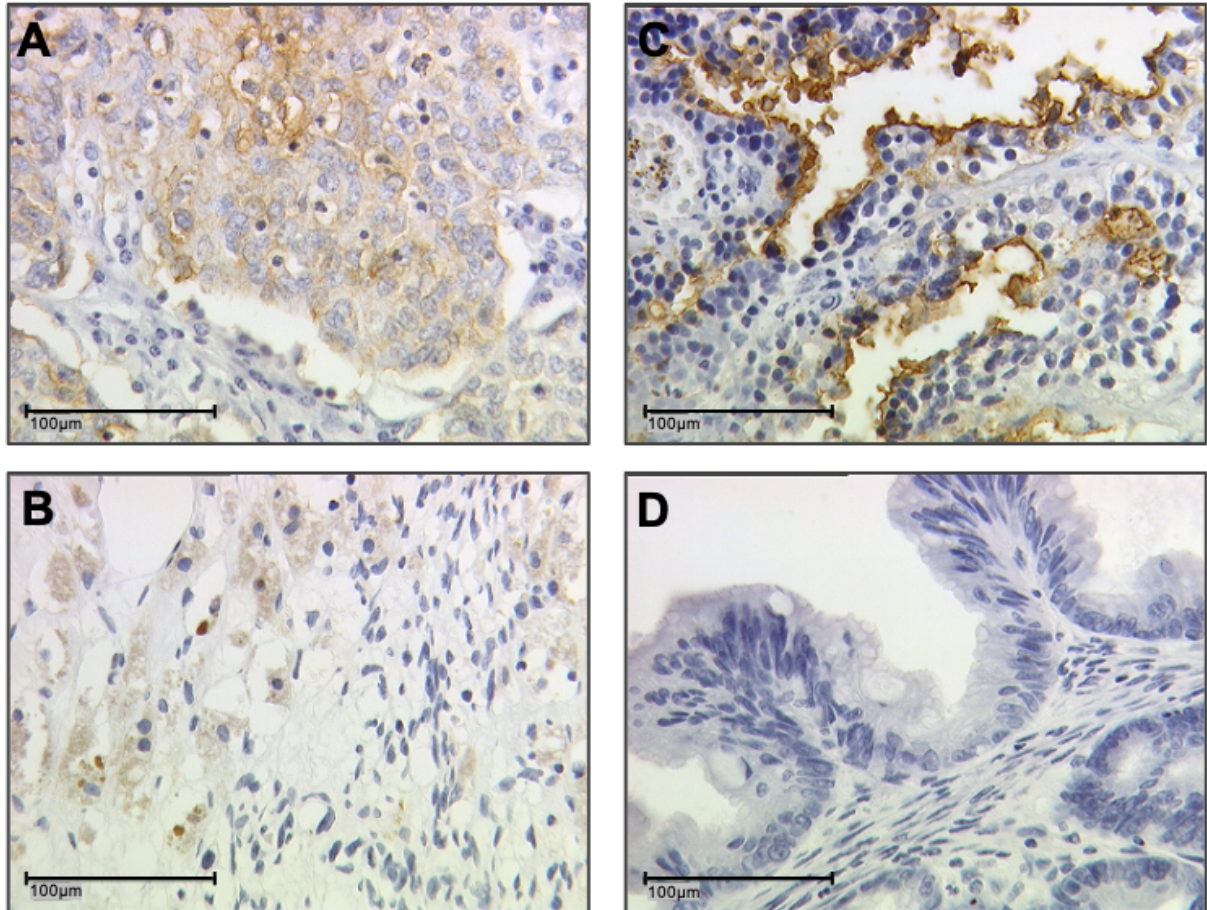

**Figure S8** TA-MUC1 (Gatipotuzumab) staining of ovarian cancer tissue of the same individuals shown in Figure 2. A serous IRS=8; B clear cell IRS=9; C endometrioid IRS=10; D mucinous IRS=1. A-D 25x (inserts, scale bar=100 µm) magnification. Correlation analysis showed a significant positive correlation between TA-MUC1 expression of the tumor and MDR1+ leucocyte infiltration ( $p=0.022$ ).

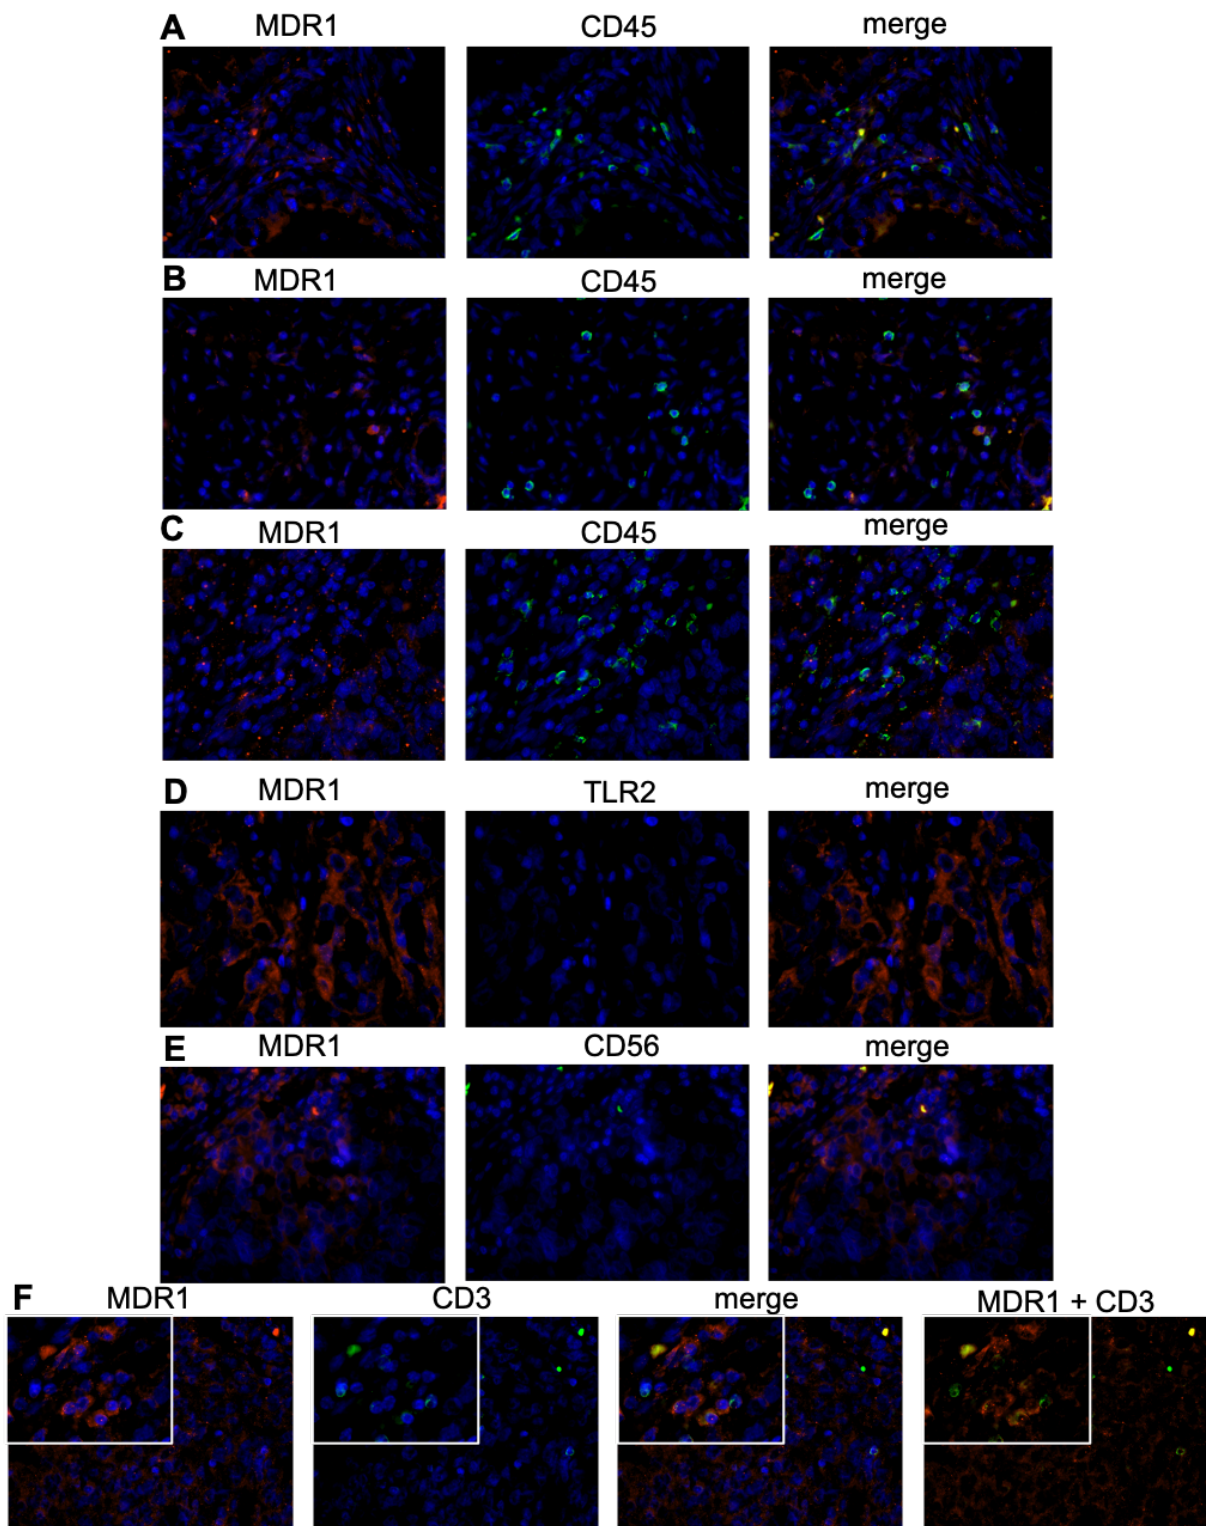

**Figure S9** Identification and characterization of the immune cell subpopulation by immunofluorescence double staining. For most CD45 positive immune cells (green) a co-localization with MDR1 (red) was observed (A mucinous, B clear cell, D endometrioid carcinoma). Due to negative co-expression of MDR1 (red) and TLR2 (green) (D) and MDR1 (red) and CD56 (green) (E) M1 macrophages and NK-cells can be excluded. In some T-cells co-expression of MDR1 (red) and CD3 (green) was found but in a fewer amount than in macrophages (F). Cell nuclei were marked by DAPI (blue) staining. The pictures were analyzed in 40x respectively 63x (inserts) magnification.
